# Supplementary material for: Fabrication of highly oriented 4H-SiC gourd-shaped nanowire arrays and their field emission properties
Source: Royal Society of Chemistry journal article supplement (doi:10.1039/c6tc00450d), 2016-01-01
Supplement: c6tc00450d1.pdf [file c6tc00450d1.pdf]

[Electronic Supplementary Information](#)

**Fabrication of Highly Oriented 4H-SiC Gourd-shaped Nanowire Arrays and  
Their Field Emission Properties**

*Chunmei Chen<sup>1,2</sup>, Shanliang Chen<sup>2</sup>, Minghui Shang<sup>2</sup>, Fengmeigao<sup>2</sup>, Zuobao Yang<sup>2</sup>, Qiao  
Liu<sup>2</sup>, Zhiyong He<sup>1,\*</sup> and Weiyong Yang<sup>2,\*</sup>*

<sup>1</sup> Research Institute of Surface Engineering, Taiyuan University of Technology, Taiyuan City, 030024,  
P.R. China.

<sup>2</sup> Institute of Materials, Ningbo University of Technology, Ningbo City, 315016, P.R. China.

Corresponding authors. E-mails: [hezhiyong@tyut.edu.cn](mailto:hezhiyong@tyut.edu.cn) (Z. He) and [weiyouyang@tsinghua.org.cn](mailto:weiyouyang@tsinghua.org.cn) (W.  
Yang)

**Table S1.** Turn-on fields ( $E_{t0}$ )<sup>a</sup> of various SiC and typical inorganic semiconductor nanostructured emitters.

|                                                                                    | Emitters                                                                               | Preparation Methods              | $E_{t0}$ (V/ $\mu$ m)                                          | Ref.      |
|------------------------------------------------------------------------------------|----------------------------------------------------------------------------------------|----------------------------------|----------------------------------------------------------------|-----------|
| Typical SiC nanostructured field emitters that fabricated by the anodic oxidation  | 4H-SiC gourd-like nanowires arrays                                                     | Electrochemical anodic oxidation | 0.95                                                           | This work |
|                                                                                    | SiC nanoporous                                                                         | Electrochemical anodic oxidation | Current density reached 6 A/ cm <sup>2</sup> at 7.5 V/ $\mu$ m | 1         |
| Typical SiC nanostructured field emitters that having the degree of sharp features | Au-decorated SiC nanowires                                                             | Pyrolysis of polysilazane        | 1.14                                                           | 2         |
|                                                                                    | P-doped SiC nanoparticles                                                              | Pyrolysis of polysilazane        | 0.73-1.03                                                      | 3         |
|                                                                                    | Carbon decorated SiC nanowires                                                         | Chemical vapor reaction          | 0.5                                                            | 4         |
|                                                                                    | Aligned SiC tower-like nanowires                                                       | Pyrolysis of polysilazane        | 1.5                                                            | 5         |
|                                                                                    | B-doped 3C-SiC nanowires                                                               | Pyrolysis of polysilazane        | 1.35                                                           | 6         |
|                                                                                    | Al <sub>2</sub> O <sub>3</sub> -decorated tubular SiC                                  | Heating evaporation              | 2.4                                                            | 7         |
|                                                                                    | Al-doped $\beta$ -SiC nanowires                                                        | Pyrolysis of polysilazane        | 0.55-1.54                                                      | 8         |
|                                                                                    | $\beta$ -SiC nanoarchitectures                                                         | Thermochemical process           | 12                                                             | 9         |
|                                                                                    | Bamboo-like $\beta$ -SiC nanowires                                                     | Thermal evaporation              | 10.1                                                           | 10        |
|                                                                                    | <i>n</i> -type SiC nanoneedles emitters                                                | Pyrolysis of polysilazane        | 1.11-1.38                                                      | 11        |
|                                                                                    | <i>n</i> -type $\beta$ -SiC nanoarrays                                                 | Pyrolysis of polysilazane        | 1.57-1.95                                                      | 12        |
|                                                                                    | B-doped SiC nanoneedles arrays                                                         | Pyrolysis of polysilazane        | 0.98                                                           | 13        |
|                                                                                    | N-doped 3C-SiC nanoneedles                                                             | Pyrolysis of polysilazane        | 0.67                                                           | 14        |
|                                                                                    | N-doped 3C-SiC nanoneedles                                                             | Pyrolysis of polysilazane        | ~1.1                                                           | 15        |
|                                                                                    | Typical SiC nanostructured field emitters that not having the degree of sharp features | N-doped $\beta$ -SiC nanowires   | Pyrolysis of polysilazane                                      | 1.90-2.65 |
| Tapered SiC Nanowires                                                              |                                                                                        | Chemical vapor deposition        | ~1.2                                                           | 17        |
| $\beta$ -SiC nanowires                                                             |                                                                                        | Pyrolysis of polysilazane        | 0.66-1.3                                                       | 18        |
| $\beta$ -SiC nanowires                                                             |                                                                                        | Chemical vapor reaction          | 1.0-2.0                                                        | 19        |
| $\beta$ -SiC nanowires                                                             |                                                                                        | Thermal heating process          | --                                                             | 20        |
| Tubular $\beta$ -SiC                                                               |                                                                                        | Template- and catalyst-free      | 5                                                              | 21        |
| $\beta$ -SiC nanowires                                                             |                                                                                        | Chemical vapor deposition        | --                                                             | 22        |
| Aligned SiC porous nanowires                                                       |                                                                                        | In situ carbonizing              | 2.3-2.9                                                        | 23        |
| Nonaligned SiC nanowires                                                           |                                                                                        | Thermal evaporation              | 3.1-3.5                                                        | 24        |
| SiC nanowires/nanorods                                                             |                                                                                        | Thermal heating process          | 3.33                                                           | 25        |
| Typical inorganic semiconductor nanostructured emitters                            | WO <sub>3</sub> nanowires                                                              | Chemical vapor deposition        | 1.8                                                            | 26        |
|                                                                                    | Tungsten oxide nanowires                                                               | Thermal evaporation              | --                                                             | 27        |
|                                                                                    | Highly wrinkled graphene                                                               | Wet chemical route               | 1.18                                                           | 28        |
|                                                                                    | SnO <sub>2</sub> nanowires arrays                                                      | Deposition and vapor             | 3.3                                                            | 29        |
|                                                                                    | SnO <sub>2</sub> nanowires                                                             | Thermal evaporation              | 3.5                                                            | 30        |
|                                                                                    | Patterned carbon nanotube arrays                                                       | Carbothermal reduction           | 0.4                                                            | 31        |
|                                                                                    | Ultrathin BN nanosheets                                                                | Chemical vapor deposition        | 1.9                                                            | 32        |
|                                                                                    | Ultrafine ZnS nanobelts                                                                | Thermal evaporation              | 3.47                                                           | 33        |
|                                                                                    | Single-crystalline CdS nanobelts                                                       | Chemical vapor deposition        | 3.7                                                            | 34        |

|                                                          |                           |           |    |
|----------------------------------------------------------|---------------------------|-----------|----|
| Ordered CdS nanostructure arrays                         | Chemical vapor deposition | 12.2      | 35 |
| Single-crystalline PrB <sub>6</sub> nanorods             | Gas-solid reaction        | 0.95-2.80 | 36 |
| Aligned LaB <sub>6</sub> nanowires arrays                | Chemical vapor deposition | 1.82      | 37 |
| Aligned untralong ZnO nanobelts                          | Thermal evaporation       | 1.3       | 38 |
| ZnS nanobelts quasi-arrays                               | Thermal evaporation       | 3.55      | 39 |
| TaSi <sub>2</sub> nanowires                              | Thermal evaporation       | 4-4.5     | 40 |
| Si-doped AlN nanoneedle array                            | Thermal evaporation       | 1.8       | 41 |
| Co <sub>5</sub> Ge <sub>7</sub> nanowire/nanobelt arrays | Chemical vapor transport  | 1.6       | 42 |
| Carbon nanoparticles                                     | Low-cost flame synthesis  | 1.33      | 43 |

<sup>a</sup> The turn-on fields required to generate an emission current density of 10  $\mu\text{A}/\text{cm}^2$ . If other values are used, it will be mentioned separately.

## References

1. M.G. Kang, H. J. Lezec and F. Sharifi, *Nanotechnology*, 2013, **24**, 065201.
2. Q. Chen, S. Chen, F. Gao, L. Wang, Z. Xie and W. Yang, *J. Mater. Chem. C*, 2016, **4**, 1363.
3. S. Chen, M. Shang, F. Gao, L. Wang, P. Ying, W. Yang and X. Fang, *Adv. Sci.*, 2016, **3**, 1500256.
4. M. Zhang, Z. Li, J. Zhao, L. Gong, A. Meng, X. Liu, X. Fan and X. Qi, *J. Mater. Chem. C*, 2015, **3**, 658.
5. L. Wang, C. Li, Y. Yang, S. Chen, F. Gao, G. Wei and W. Yang, *ACS Appl. Mater. Interfaces*, 2014, **7**, 526.
6. Y. Yang, H. Yang, G. Wei, L. Wang, M. Shang, Z. Yang, B. Tang and W. Yang, *J. Mater. Chem. C*, 2014, **2**, 4515.
7. H. Cui, L. Gong, G. Z. Yang, Y. Sun, J. Chen, and C. X. Wang, *Phys. Chem. Chem. Phys.*, 2011, **13**, 985.
8. X. Zhang, Y. Chen, Z. Xie and W. Yang, *J. Phys. Chem. C*, 2010, **114**, 8251.
9. G. Shen, Y. Bando and D. Golberg, *Cryst. Growth Des.*, 2007, **7**, 35.
10. G. Shen, Y. Bando, C. Ye, B. Liu and D. Golberg, *Nanotechnology*, 2006, **17**, 3468.
11. S. Chen, P. Ying, L. Wang, G. Wei, F. Gao, J. Zheng, M. Shang, Z. Yang, W. Yang and T. Wu, *NPG Asia Mater.*, 2015, **7**, e157.
12. L. Wang, F. Gao, S. Chen, C. Li and W. Yang, *Appl. Phys. Lett.*, 2015, **107**, 122108.
13. L. Wang, G. Wei, F. Gao, C. Li and W. Yang, *Nanoscale*, 2015, **7**, 7585.
14. S. Chen, P. Ying, L. Wang, G. Wei and W. Yang, *Appl. Phys. Lett.*, 2014, **105**, 133106.
15. X. Zhang, Y. Chen, W. Liu, W. Xue, J. Li and Z. Xie, *J. Mater. Chem. C*, 2013, **1**, 6479.
16. S. Chen, P. Ying, L. Wang, G. Wei, J. Zheng, F. Gao, S. Su and W. Yang, *J. Mater. Chem. C*, 2013, **1**, 4779.
17. R. Wu, K. Zhou, J. Wei, Y. Huang, F. Su, J. Chen and L. Wang, *J. Phys. Chem. C*, 2012, **116**, 12940.
18. G. Wei, H. Liu, C. Shi, F. Gao, J. Zheng, G. Wei and W. Yang, *J. Phys. Chem. C*, 2011, **115**, 13063.
19. Z. Li, W. Ren and A. Meng, *Appl. Phys. Lett.*, 2010, **97**, 263117.

20. G. Yang, H. Cui, Y. Sun, L. Gong, J. Chen, D. Jiang and C. Wang, *J. Phys. Chem. C*, 2009, **113**, 15969.
21. H. Cui, Y. Sun, G. Z. Yang, J. Chen, D. Jiang and C. X. Wang, *Chem. Commun.*, 2009, **41**, 6243.
22. D. W. Kim, Y. J. Choi, K. J. Choi, J. G. Park, J. H. Park, S. M. Pimenov, V. D. Frolov, N. P. Abanshin, B. I. Gorfinkel and N. M. Rossukanyi, *Nanotechnology*, 2008, **19**, 225706.
23. Y. Yang, G. Meng, X. Liu, L. Zhang, Z. Hu, C. He and Y. Hu, *J. Phys. Chem. C*, 2008, **112**, 20126.
24. W. Zhou, Y. Wu, E. S. W. Kong, F. Zhu, Z. Hou and Y. Zhang, *Appl. Sur. Sci.*, 2006, **253**, 2056.
25. S. Z. Deng, Z. B. Li, W. L. Wang, N. S. Xu, J. Zhou, X. G. Zheng, H. T. Xu, J. Chen and J. C. She, *Appl. Phys. Lett.*, 2006, **89**, 023118.
26. L. Li, *J. Mater. Chem.*, 2011, **21**, 6525.
27. X. Zhang, L. Gong, K. Liu, Y. Cao, X. Xiao, W. Sun, X. Hu, Y. Gao, J. Chen and J. Zhou, *Adv. Mater.*, 2010, **22**, 5292.
28. U. N. Maiti, S. Maiti, R. Thapa and K. K. Chattopadhyay, *Nanotechnology*, 2010, **21**, 505701.
29. K. Deng, L. Hao, Z. Shi, Q. Liu and L. Liang, *ACS Appl. Mater. Interfaces*, 2013, **5**, 7845.
30. X. Fang, J. Yan, L. Hu, H. Liu and P. S. Lee, *Adv. Funct. Mater.*, 2012, **22**, 1613.
31. N. Liu, G. Fang, W. Zeng, H. Zhou, H. Long and X. Zhao, *J. Mater. Chem.*, 2012, **22**, 3478.
32. Z. G. Chen and J. Zou, *J. Mater. Chem.*, 2011, **21**, 1191.
33. X. Fang, Y. Bando, G. Shen, C. Ye, U. K. Gautam, P. Costa, C. Zhi, C. Tang and D. Golberg, *Adv. Mater.*, 2007, **19**, 2593.
34. L. Li, P. Wu, X. Fang, T. Zhai, L. Dai, M. Liao, Y. Koide, H. Wang, Y. Bando and D. Golberg, *Adv. Mater.*, 2010, **22**, 3161.
35. Z. Tianyou, F. Xiaosheng, B. Yoshio, L. Qing, X. Xijin, Z. Haibo, M. Ying, Y. Jiannian and G. Dmitri, *ACS Nano*, 2009, **3**, 949.
36. Q. Y. Zhang, J. Q. Xu, Y. M. Zhao, X. H. Ji and S. P. Lau, *Adv. Funct. Mater.*, 2009, **19**, 742.
37. J. Xu, G. Hou, H. Li, T. Zhai, B. Dong, H. Yan, Y. Wang, B. Yu, Y. Bando and D. Golberg, *NPG Asia Mater.*, 2013, **5**, e53.
38. W. Z. Wang, B. Q. Z. J. Yang, B. Poudel, J. Y. Huang, M. J. Naughton and Z. F. Ren, *Adv. Mater.*, 2006, **18**, 3275.
39. X. Fang, Y. Bando, C. Ye and D. Golberg, *Chem. Commun.*, 2007, **29**, 3048.

40. Y. L. Chueh, M. T. Ko, L. J. Chou, L. J. Chen, C. S. Wu and C. D. Chen, *Nano Lett.*, 2006, **6**, 1637.
41. Y. B. Tang, H. T. Cong, Z. M. Wang and H. M. Cheng, *Appl. Phys. Lett.*, 2007, **89**, 253112.
42. H. Yoon, K. Seo, N. Bagkar, J. In, J. Park, J. Kim and B. Kim, *Adv. Mater.*, 2009, **21**, 4979.
43. L. Yuan, Y. T, C. Jian, J. Dai, T. Song, M. Ruan, Z. Ma, G. Li, L. Kang and X. Zhang, *Adv. Funct. Mater.*, 2011, **21**, 2150.
